# Supplementary material for: A high-TC heavy rare earth monoxide semiconductor TbO with a more than half-filled 4f orbital
Source: Royal Society of Chemistry journal article supplement (doi:10.1039/d2dt02710k), 2022-01-01
Supplement: d2dt02710k1.pdf [file d2dt02710k1.pdf]

## Supplementary Information

### **A high- $T_C$ heavy rare earth monoxide semiconductor TbO with more than half-filled 4f orbital**

Satoshi Sasaki,<sup>a</sup> Daichi Oka,<sup>a</sup> Kenichi Kaminaga,<sup>b</sup> Daichi Saito,<sup>a</sup> Taku Yamamoto,<sup>a</sup> Nobuto Abe,<sup>a</sup> Hirokazu Shimizu<sup>a</sup> and Tomoteru Fukumura<sup>\*a,c,d,e</sup>

<sup>a</sup> Department of Chemistry, Graduate School of Science, Tohoku University, Sendai 980-8578, Japan E-mail: tomoteru.fukumura.e4@tohoku.ac.jp

<sup>b</sup> Department of Applied Chemistry, School of Engineering, Tohoku University, Sendai 980-8579, Japan

<sup>c</sup> Advanced Institute for Materials Research (WPI-AIMR) and Core Research Cluster, Tohoku University, Sendai 980-8577, Japan

<sup>d</sup> Center for Science and Innovation in Spintronics, Organization for Advanced Studies, Tohoku University, Sendai 980-8577, Japan

<sup>e</sup> Center for Spintronics Research Network, Tohoku University, Sendai 980-8577, Japan

Table S1 Growth parameters of TbO, Tb<sub>2</sub>O<sub>3</sub>, and Tb thin films.

| Sample                         | Substrate               | Target                         | $T_{\text{substrate}}$<br>[°C] | $P_{\text{O}_2}$<br>[Torr] | $E_{\text{laser}}$<br>[J/cm <sup>2</sup> ] | Repetition rate<br>[Hz] |
|--------------------------------|-------------------------|--------------------------------|--------------------------------|----------------------------|--------------------------------------------|-------------------------|
| TbO                            | CaF <sub>2</sub> (001)  | Tb <sub>4</sub> O <sub>7</sub> | 375                            | -                          | 0.75                                       | 15                      |
| Tb <sub>2</sub> O <sub>3</sub> | YAlO <sub>3</sub> (110) | Tb <sub>4</sub> O <sub>7</sub> | 250                            | $5.0 \times 10^{-6}$       | 0.50                                       | 5                       |
| Tb                             | CaF <sub>2</sub> (111)  | Tb                             | R.T.                           | -                          | 0.70                                       | 20                      |

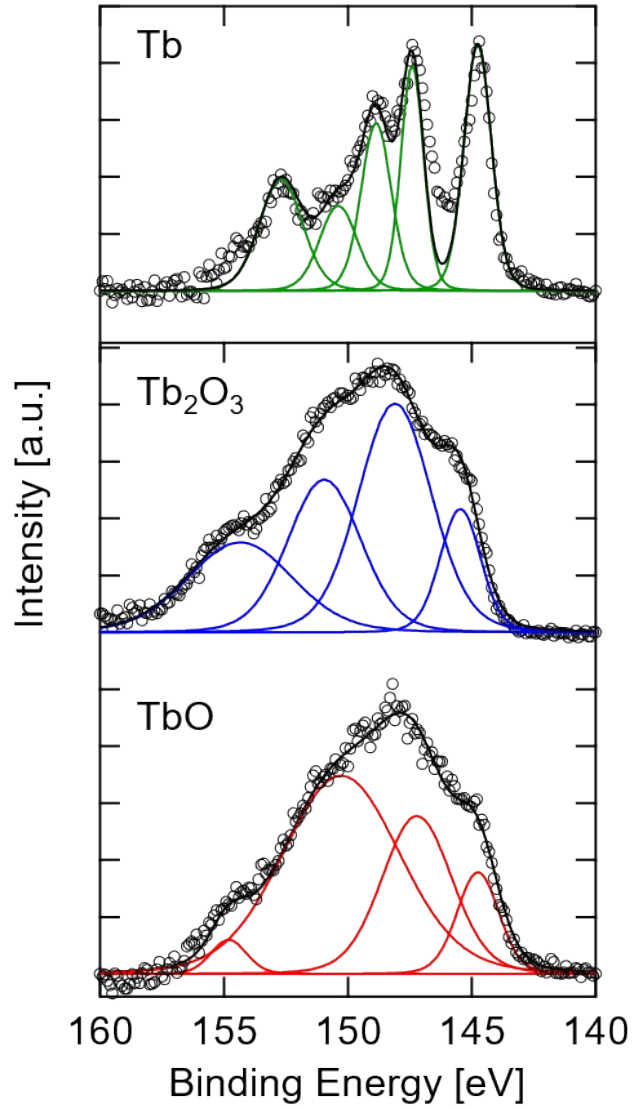

Fig. S1 Tb 4d XPS spectra of TbO, Tb<sub>2</sub>O<sub>3</sub> and Tb thin films. The atomic ratio of Tb:O in TbO thin film was evaluated to be 1:0.95, as described below. Prior to the measurements, capping or surface oxidation layer was removed by in-situ Ar ion sputtering.

## Quantitative analysis of TbO layer in TbO thin film by XPS

The composition of a TbO thin film was determined from the areal intensity ratio of Tb 4d and O 1s peaks by XPS measurements. The surface oxidized Tb<sub>2</sub>O<sub>3</sub> layer of the TbO thin film was removed by Ar<sup>+</sup> sputtering. For the quantitative composition analysis, a Tb<sub>2</sub>O<sub>3</sub> thin film was used as a reference, assuming its stoichiometric composition.

The Tb:O ratio was evaluated by considering the electron inelastic mean free paths (IMFP) with the TPP-2M predictive equation.<sup>S1</sup> The atomic concentration of each atom  $C_i$  ( $i = \text{Tb, O}$ ) in TbO was obtained by the areal intensity of each atom in TbO and Tb<sub>2</sub>O<sub>3</sub> ( $I_i^{\text{TbO}}, I_i^{\text{Tb2O3}}$ ), the IMFP of each atom in TbO and Tb<sub>2</sub>O<sub>3</sub> ( $\lambda_i^{\text{TbO}}, \lambda_i^{\text{Tb2O3}}$ ), and the atomic density of each atom in TbO and Tb<sub>2</sub>O<sub>3</sub> ( $N_i^{\text{TbO}}, N_i^{\text{Tb2O3}}$ ) as follows, where  $K_i$  is relative intensity  $K_i = I_i^{\text{TbO}}/I_i^{\text{Tb2O3}}$ .<sup>S2</sup>

$$\begin{aligned} C_i &= (I_i^{\text{TbO}}/I_i^{\text{Tb2O3}})/\{(N_i^{\text{TbO}}/N_i^{\text{Tb2O3}}) \times (\lambda_i^{\text{TbO}}/\lambda_i^{\text{Tb2O3}})\} \\ &= (K_i)/\{(N_i^{\text{TbO}}/N_i^{\text{Tb2O3}}) \times (\lambda_i^{\text{TbO}}/\lambda_i^{\text{Tb2O3}})\} \\ &= (K_i) \times \{(N_i^{\text{Tb2O3}}) \times (\lambda_i^{\text{Tb2O3}}/\lambda_i^{\text{TbO}})\}/N_i^{\text{TbO}} \end{aligned}$$

The relative intensity ( $K_i$ ) of Tb and O was calculated to be  $K_{\text{Tb}} = 1.01$  and  $K_{\text{O}} = 0.596$ . Because of unknown  $N_i^{\text{TbO}}$ , the relative atomic concentration ( $C_i^{\text{rel}}$ ) was introduced with the matrix factor,  $F_i = N_i^{\text{Tb2O3}} \times (\lambda_i^{\text{Tb2O3}}/\lambda_i^{\text{TbO}})$ .<sup>S2</sup>

$$C_i^{\text{rel}} = C_i / \sum C_i = (K_i F_i / N_i^{\text{TbO}}) / \sum (K_i F_i / N_i^{\text{TbO}}) = (K_i F_i) / \sum (K_i F_i)$$

From the TPP-2M IMFP equation,  $\lambda_{\text{Tb}}^{\text{TbO}} = 5.68 \text{ \AA}$  and  $\lambda_{\text{O}}^{\text{TbO}} = 7.98 \text{ \AA}$ , while  $\lambda_{\text{Tb}}^{\text{Tb2O3}} = 7.65 \text{ \AA}$  and  $\lambda_{\text{O}}^{\text{Tb2O3}} = 11.5 \text{ \AA}$ . In the referential Tb<sub>2</sub>O<sub>3</sub> thin film,  $N_{\text{Tb}}^{\text{Tb2O3}} = 0.0496 \text{ mol/cm}^3$  and  $N_{\text{O}}^{\text{Tb2O3}} = 0.0596 \text{ mol/cm}^3$ . Thus, the matrix factor  $F_{\text{Tb}} = 0.0537$  and  $F_{\text{O}} = 0.0861$ . Thus,

$$C_{Tb}^{rel} = (K_{Tb}/F_{Tb}) / (K_{Tb} \times F_{Tb} + K_O \times F_O) = 0.513,$$

$$C_O^{rel} = (K_O/F_O) / (K_{Tb} \times F_{Tb} + K_O \times F_O) = 0.486.$$

Therefore, the Tb:O ratio of TbO thin film,  $C_{Tb}^{rel}:C_O^{rel}$ , was 1:0.95.

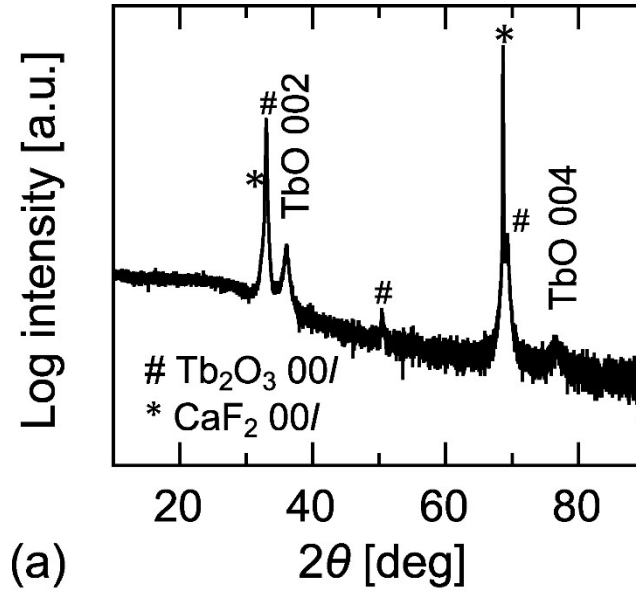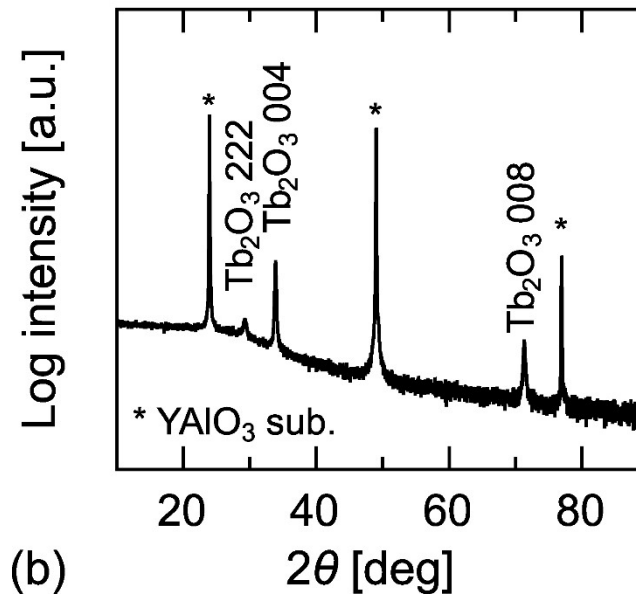

Fig. S2 Typical XRD  $\theta$ - $2\theta$  patterns of (a) TbO thin film grown on  $\text{CaF}_2$  (001) substrate (the same data as Fig. 1a) and (b)  $\text{Tb}_2\text{O}_3$  thin film grown on  $\text{YAlO}_3$  (110) substrate.

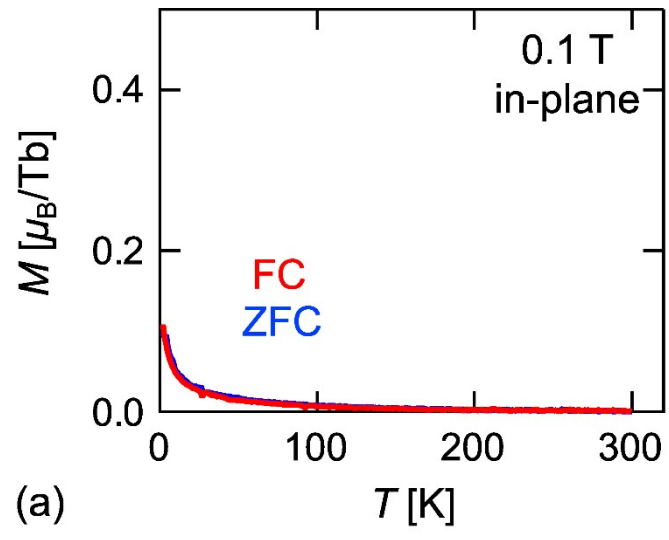

(a)

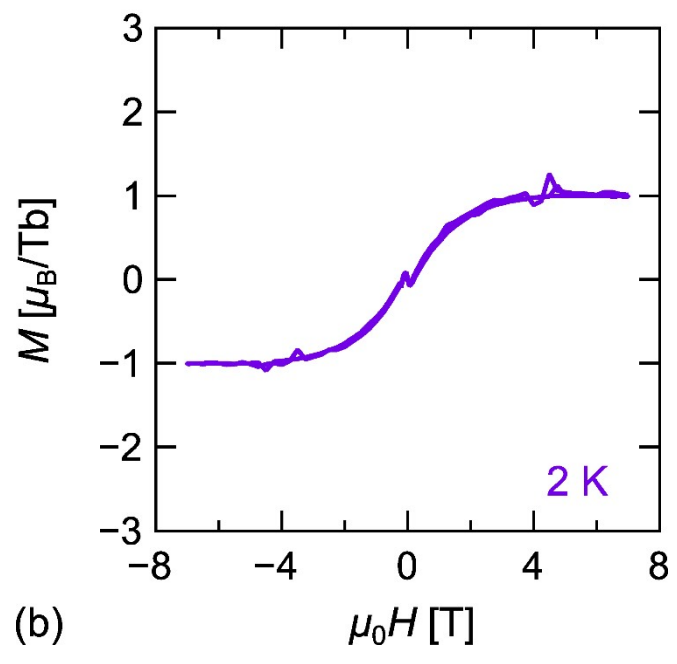

(b)

Fig. S3 (a) Temperature and (b) magnetic field dependence of magnetization for  $Tb_2O_3$  (001) epitaxial thin film under in-plane magnetic field.

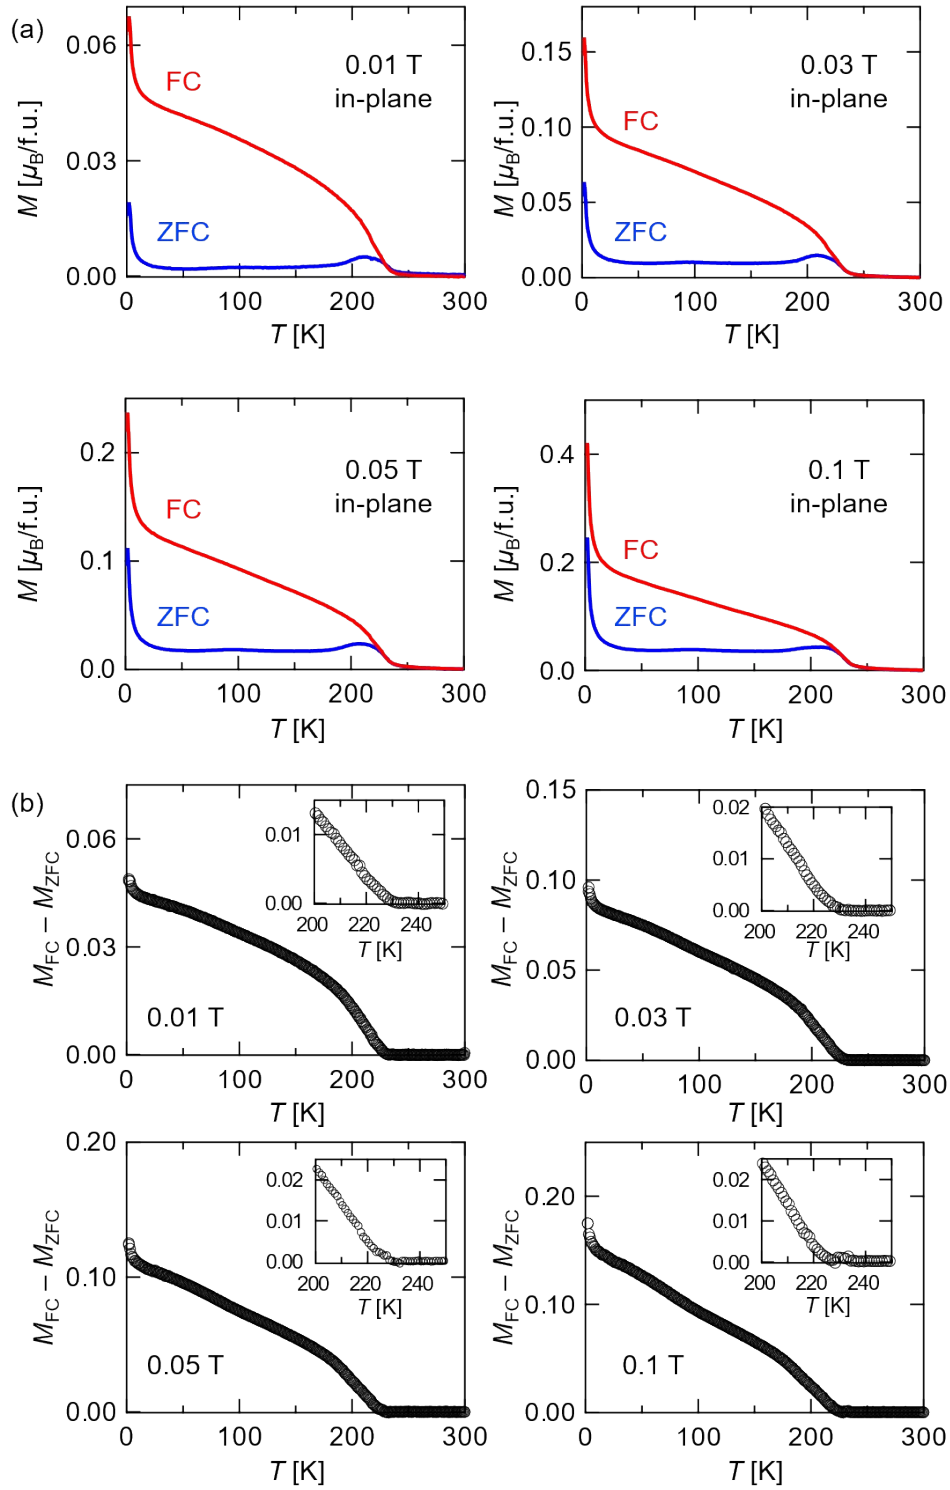

Fig. S2 (a) In-plane  $M$ - $T$  curves during ZFC and FC for TbO epitaxial thin film under different magnetic field. (b) The difference between the FC and ZFC curves. Inset shows magnified view around  $T_C$ .



## References

- <sup>S1</sup> S. Tanuma, C.J. Powell and D.R. Penn, Calculation of electron inelastic mean free paths (IMFPs) VII. Reliability of the TPP-2M IMFP predictive equation. *Surf. Interface Anal.*, 2003, **35**, 268–275.
- <sup>S2</sup> S. Tanuma, Quantitative Surface Analysis by X-ray Photoelectron Spectroscopy. *J. Surf. Anal.*, 1998, **4**, 20–34.
